# Supplementary material for: Structure of the p53 degradation complex from HPV16
Source: PubMed Central journal article supplement (PMC10902388; doi:10.1038/s41467-024-45920-w), 2024-02-28
Supplement: 41467_2024_45920_MOESM3_ESM.pdf [file 41467_2024_45920_MOESM3_ESM.pdf]

## **Description of Additional Supplementary Files**

**File name: Supplementary Data 1**

**Description:** Individual protein contacts from the protein contact utility in MOE was used to define interactions using the default settings and a summary of all interactions in Excel file format.

**File name: Supplementary Data 2**

**Description:** The protonated 16E6, E6AP, and p53<sup>core</sup> ternary complex was exported in the MOE file format.

**File name: Supplementary Data 3**

**Description:** The protonated 16E6, E6AP, and p53<sup>core</sup> ternary complex was exported in the PDB file format.
